# Supplementary material for: Insights into Kidney Dysplasia in Duplex Kidneys: From Radiologic Diagnosis to Histopathologic Understanding
Source: MDPI journal article supplement (doi:10.3390/biomedicines12051126), 2024-05-18
Supplement: s1 [file s1]

**Table S1.** Histopathologic results in resected moieties in the examined group after heminephrectomy.

| Patient number | Renal dysplasia             | % of the dysplasia * | % of fibrosis ** | The severity of inflammation*** | Lymphoplasia | Arteriolosclerosis **** | Microcalcifications | Other                           |
|----------------|-----------------------------|----------------------|------------------|---------------------------------|--------------|-------------------------|---------------------|---------------------------------|
| 1              | Yes                         | 10%                  | 80%              | 2                               | Yes          | 2                       | Yes                 | Cartilage formation foci        |
| 2              | Yes                         | 10%                  | 10%              | 1                               | Yes          | 1                       | No                  | Cartilage formation foci        |
| 3              | Yes                         | 5%                   | 40%              | 3                               | Yes          | 2                       | Yes                 | Tubular thyroidization          |
| 4              | No                          | 0%                   | 10%              | 1                               | No           | 1                       | No                  |                                 |
| 5R             | Yes                         | 5%                   | 30%              | 3                               | Yes          | 3                       | Yes                 | Tubular thyroidization          |
| 5L             | Yes                         | 5%                   | 30%              | 3                               | Yes          | 2                       | Yes                 | Tubular thyroidization          |
| 6              | Yes                         | 15%                  | 20%              | 2                               | Yes          | 1                       | Yes                 |                                 |
| 7              | Yes                         | 5%                   | 10%              | 2                               | Yes          | 1                       | Yes                 |                                 |
| 8              | Yes                         | 10%                  | 30%              | 3                               | Yes          | 2                       | Yes                 | Patchy suppurative inflammation |
| 9              | Yes                         | 5%                   | 40%              | 1                               | Yes          | 1                       | No                  |                                 |
| 10             | No                          | 0%                   | 15%              | 1                               | Yes          | 1                       | No                  |                                 |
| 11LL           | Yes                         | 2%                   | 40%              | 2                               | Yes          | 2                       | Yes                 | Vascular malformation in cortex |
| 11LU           | multicystic renal dysplasia | 100%                 | 50%              | 2                               | Yes          | 2                       | No                  |                                 |
| 12             | multicystic renal dysplasia | 25%                  | 40%              | 2                               | Yes          | 2                       | Yes                 |                                 |
| 13             | Yes                         | 5%                   | 15%              | 2                               | Yes          | 1                       | No                  | Cartilage formation foci        |
| 14             | multicystic renal dysplasia | 10%                  | 25%              | 3                               | Yes          | 2                       | Yes                 | Tubular thyroidization          |
| 15             | Yes                         | 10%                  | 10%              | 2                               | Yes          | 2                       | Yes                 |                                 |

|            |              |     |     |   |     |   |     |                                          |
|------------|--------------|-----|-----|---|-----|---|-----|------------------------------------------|
| <b>16</b>  | Yes          | 5%  | 30% | 2 | Yes | 1 | No  |                                          |
| <b>17</b>  | Yes          | 15% | 20% | 2 | Yes | 2 | Yes |                                          |
| <b>18</b>  | No           | 0%  | 5%  | 1 | Yes | 1 | No  |                                          |
| <b>19</b>  | Yes          | 5%  | 40% | 2 | Yes | 2 | Yes | Subcapsular<br>tortuous blood<br>vessels |
| <b>20</b>  | no dysplasia | 0%  | 10% | 2 | Yes | 1 | Yes |                                          |
| <b>21R</b> | Yes          | 15% | 10% | 3 | Yes | 1 | No  |                                          |
| <b>21L</b> | Yes          | 15% | 15% | 3 | Yes | 2 | No  |                                          |

\* The percentage of dysplasia in a specimen estimated on haematoxylin and eosin stained slides. \*\* The percentage of sclerosed glomeruli was estimated in every specimen. \*\*\* The degree of inflammation: 1 - low, 2 - moderate, 3 – severe \*\*\*\*The degree of arteriolosclerosis: 1 - low, 2 - moderate, 3 - severe

L – left kidney, R – Right kidney, LU – left upper pole of the kidney, LL – left lower pole of the kidney,
